# Supplementary material for: A dual-flow RootChip enables quantification of bi-directional calcium signaling in primary roots
Source: PubMed Central journal article supplement (PMC9871814; doi:10.3389/fpls.2022.1040117), 2023-01-10
Supplement: DataSheet_1.pdf [file DataSheet_1.pdf]

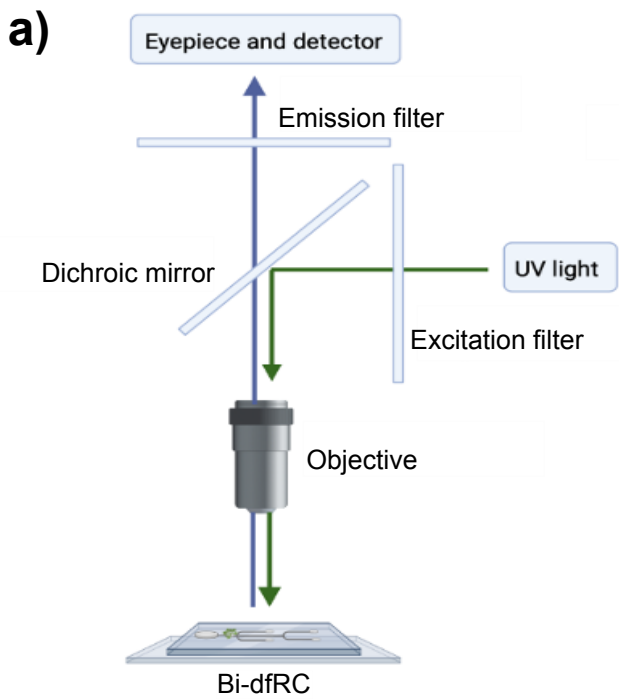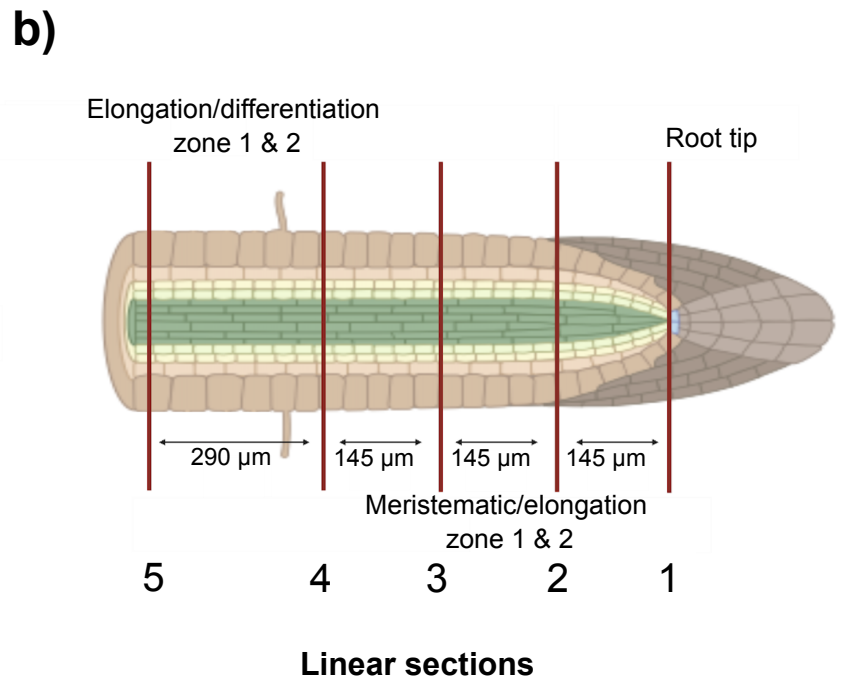

Supplemental Figure 1. (a) Schematic diagram depicting the optical path of an epifluorescence microscope. (b) Schematic diagram depicting five linear sections used for data analysis designed to capture  $\text{Ca}^{2+}$  fluorescent signal across three main zones of the Arabidopsis root; root tip (columella), meristematic/elongation zone and elongation/differentiation zone.
