# Supplementary material for: A dual-flow RootChip enables quantification of bi-directional calcium signaling in primary roots
Source: PubMed Central journal article supplement (PMC9871814; doi:10.3389/fpls.2022.1040117), 2023-01-10
Supplement: DataSheet_2.pdf [file DataSheet_2.pdf]

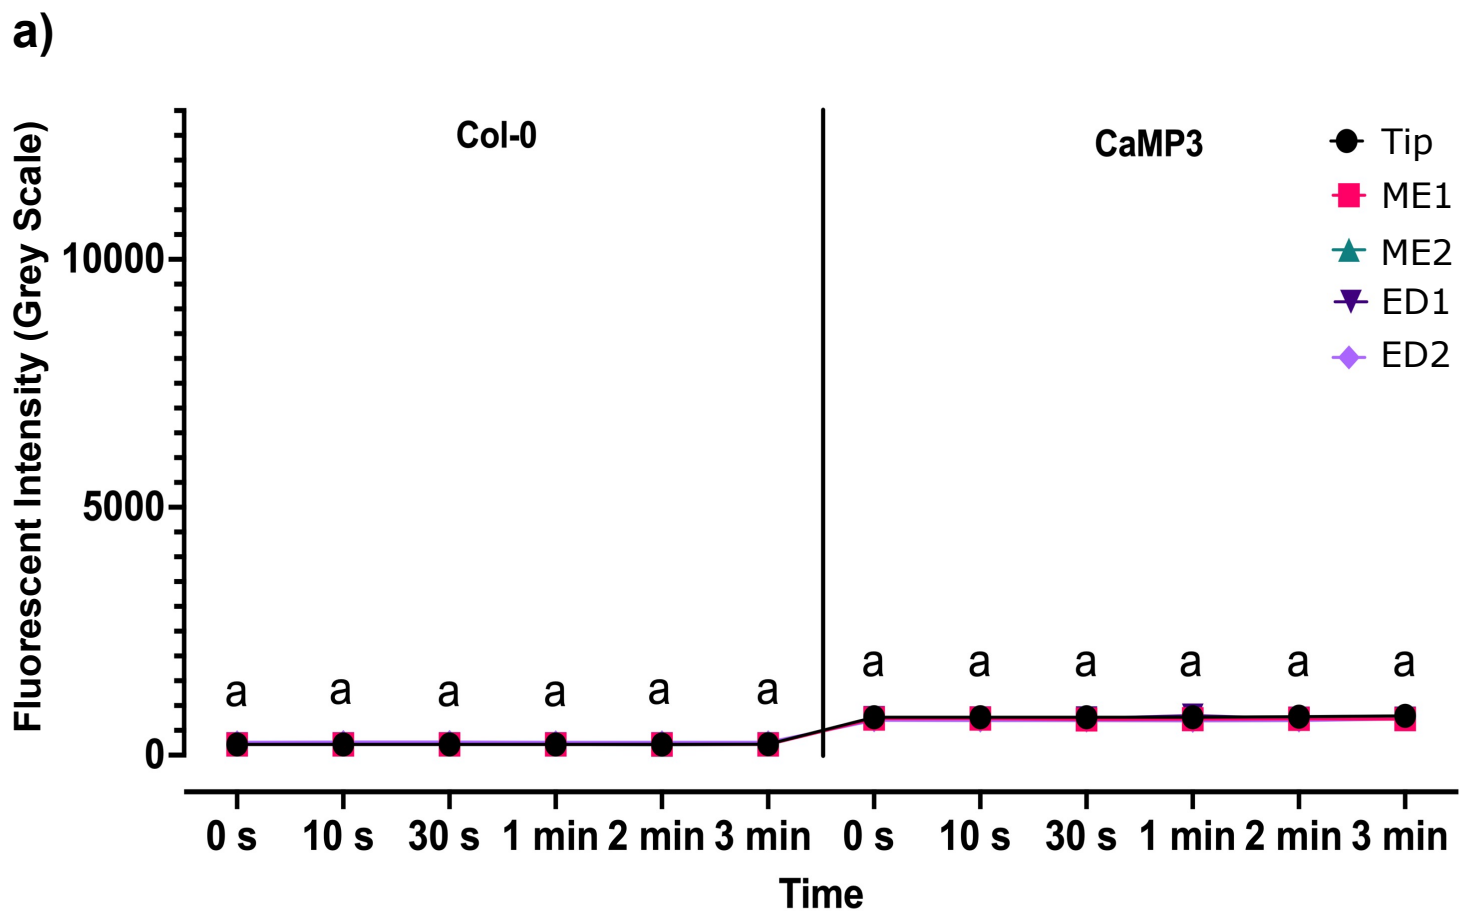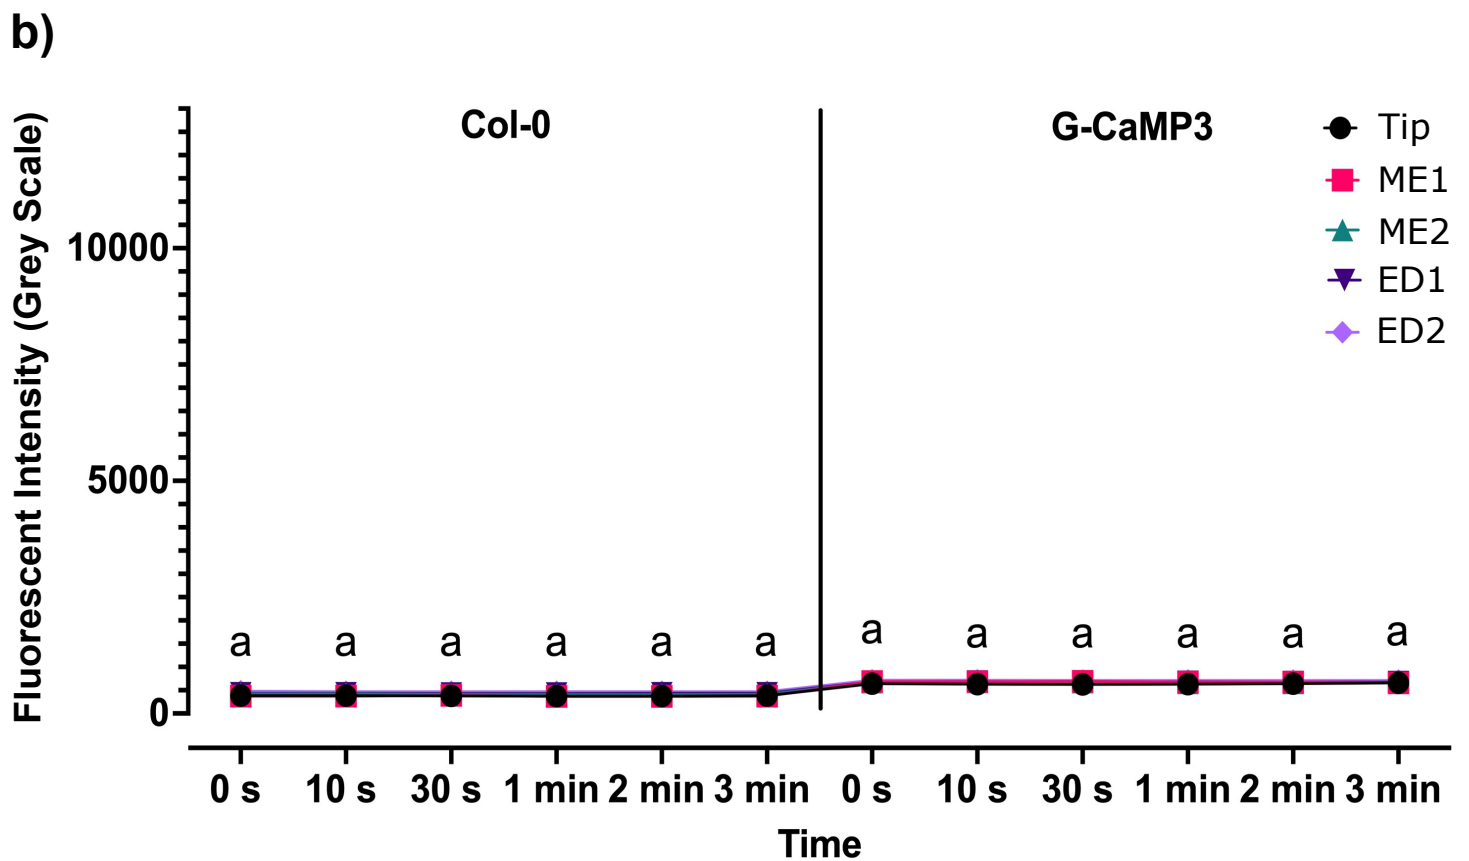

Supplemental Figure 2. Real-time fluorescence intensity tracking of  $\text{Ca}^{2+}$  in Arabidopsis G-CaMP3 and Col-0 roots exposed to  $\frac{1}{2}$  MS/0.31 mM MES control media over 180 seconds. (a) Line graph with two-way ANOVA Tukey's honestly significant difference (HSD) mean comparison test ( $P$ -value  $\leq 0.05$ ) depicting fluorescence intensity (ADU; analogue digital units) of  $\text{Ca}^{2+}$  across five linear sections (Tip, ME1, ME2, ED1 & ED2) upon targeted exposure of full control treatment at the differentiation zone ( $n=5$ ) and, (b) full control treatment at the tip ( $n=5$ ).
