# Supplementary material for: A dual-flow RootChip enables quantification of bi-directional calcium signaling in primary roots
Source: PubMed Central journal article supplement (PMC9871814; doi:10.3389/fpls.2022.1040117), 2023-01-10
Supplement: DataSheet_3.pdf [file DataSheet_3.pdf]

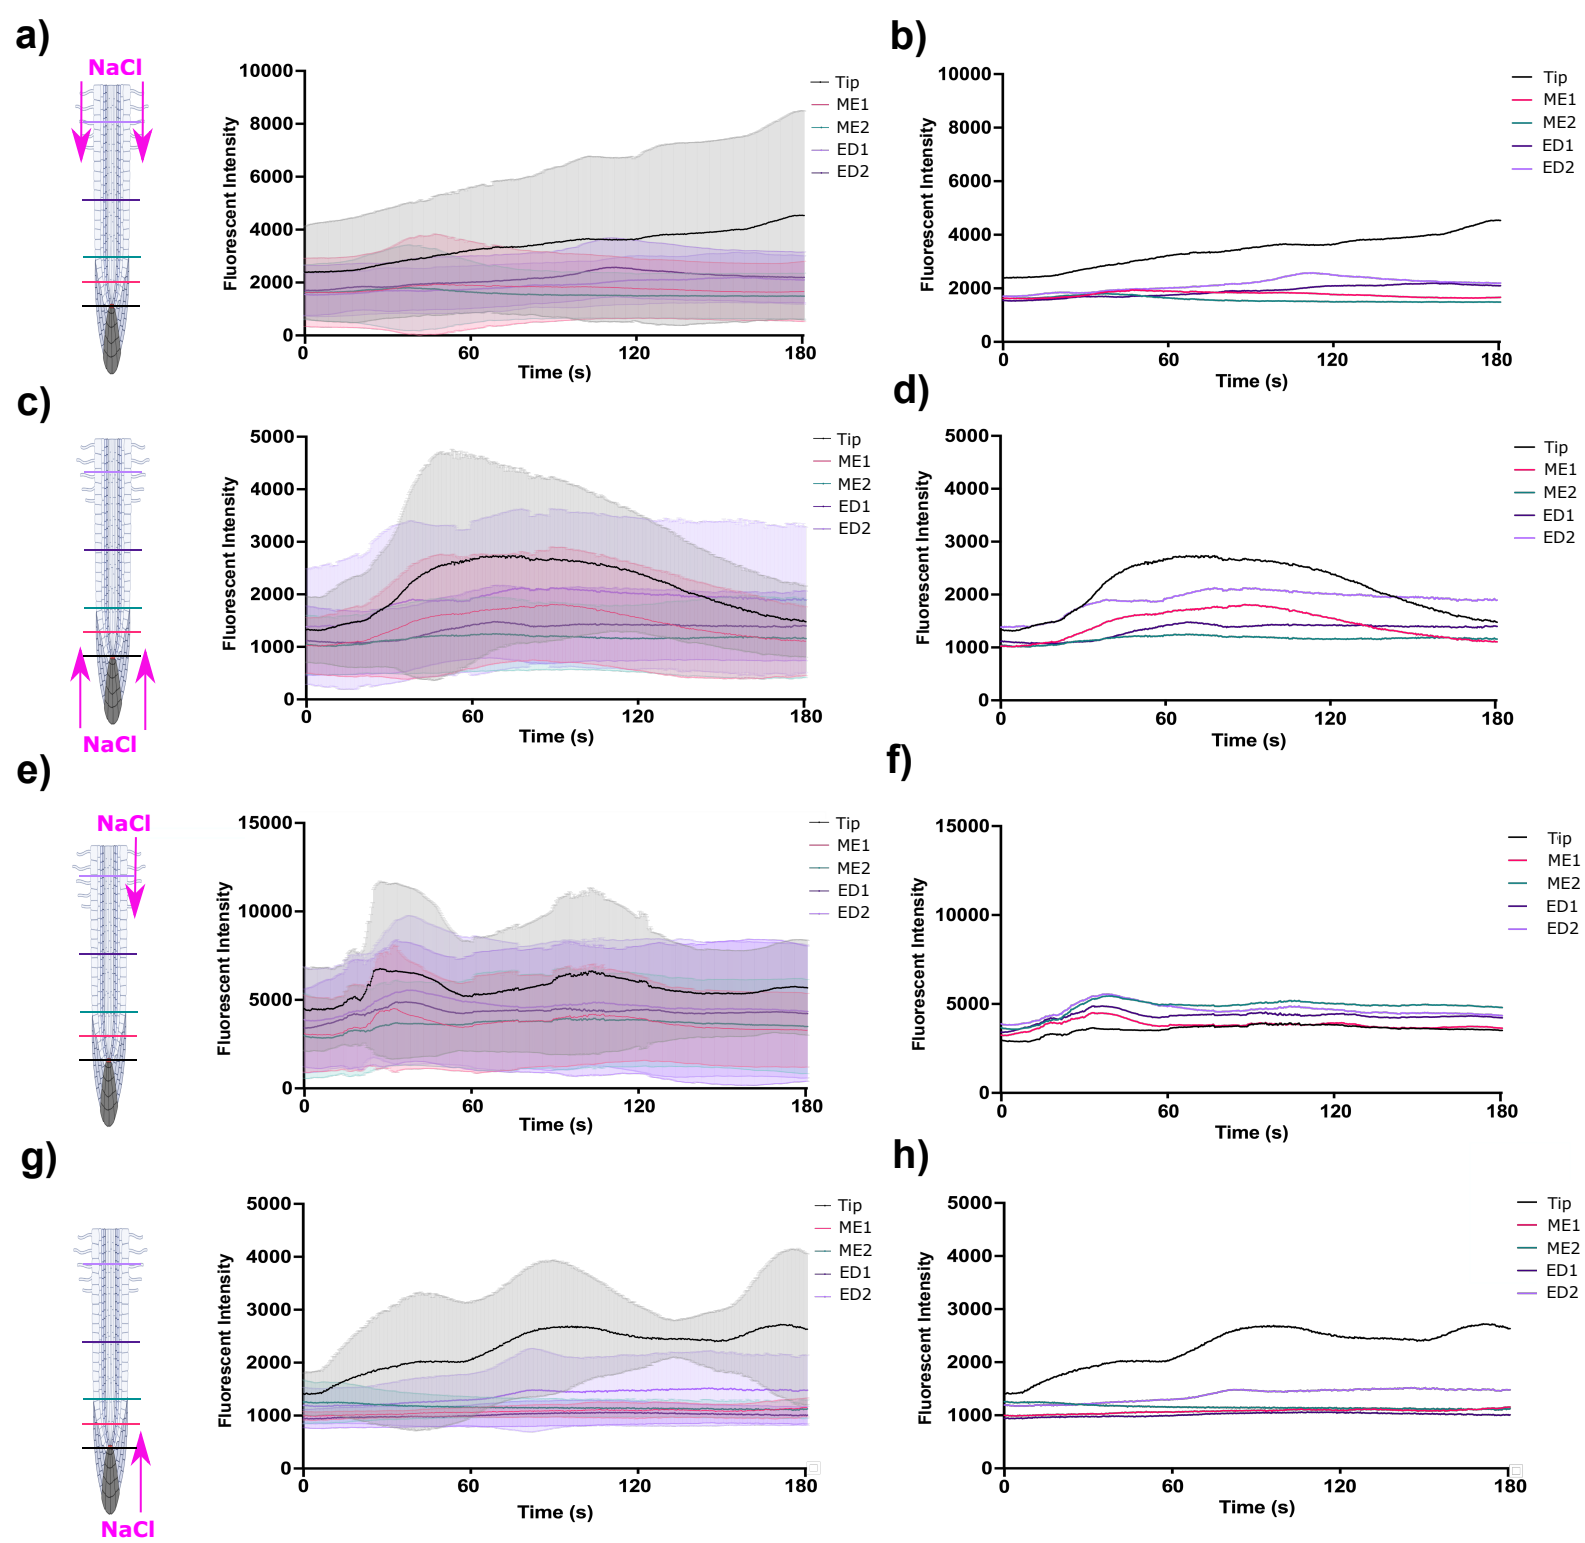

**Supplemental Figure 3.** Ca<sup>2+</sup> release and corresponding increase in G-CaMP3 fluorescence, in Arabidopsis primary roots was followed for 180 s post NaCl (100mM) treatment. Root schematics depict treatment application, orientation (salt; NaCl) and linear sections (refer to colour key). (a) Line graph depicting average fluorescence intensity (ADU; analogue digital units) of Ca<sup>2+</sup> across five linear sections (Tip, ME1, ME2, ED1 & ED2) upon targeted exposure of NaCl treatment through inlets A & B at the DZ (n = 10). Standard deviation included. (b) Line graph depicting mean fluorescence intensity (ADU; analogue digital units) of Ca<sup>2+</sup> across five linear sections upon targeted exposure of NaCl treatment through inlets A & B at the DZ (n= 10). (d) Line graph depicting average fluorescence intensity of Ca<sup>2+</sup> across five linear sections following salt treatment through inlets C & D at the tip (n= 10). Standard deviation included. (e) Line graph depicting mean fluorescence intensity of Ca<sup>2+</sup> across five linear sections following salt treatment through inlets C & D at the tip (n= 10). (e) Line graph depicting average fluorescence intensity of Ca<sup>2+</sup> across five linear sections following salt treatment through inlet B and control treatment through inlet A at the DZ (n= 10). Standard deviation included. (f) Line graph depicting mean fluorescence intensity of Ca<sup>2+</sup> across five linear sections following salt treatment through inlet B and control treatment through inlet A at the DZ (n= 10). (g) Line graph depicting average fluorescence intensity of Ca<sup>2+</sup> across five linear sections upon salt treatment through inlet D and control through inlet C at the tip (n= 5). Standard deviation included. (h) Line graph depicting mean fluorescence intensity of Ca<sup>2+</sup> across five linear sections upon salt treatment through inlet D and control through inlet C at the tip (n= 5).
