# Supplementary material for: A dual-flow RootChip enables quantification of bi-directional calcium signaling in primary roots
Source: PubMed Central journal article supplement (PMC9871814; doi:10.3389/fpls.2022.1040117), 2023-01-10
Supplement: DataSheet_4.pdf [file DataSheet_4.pdf]

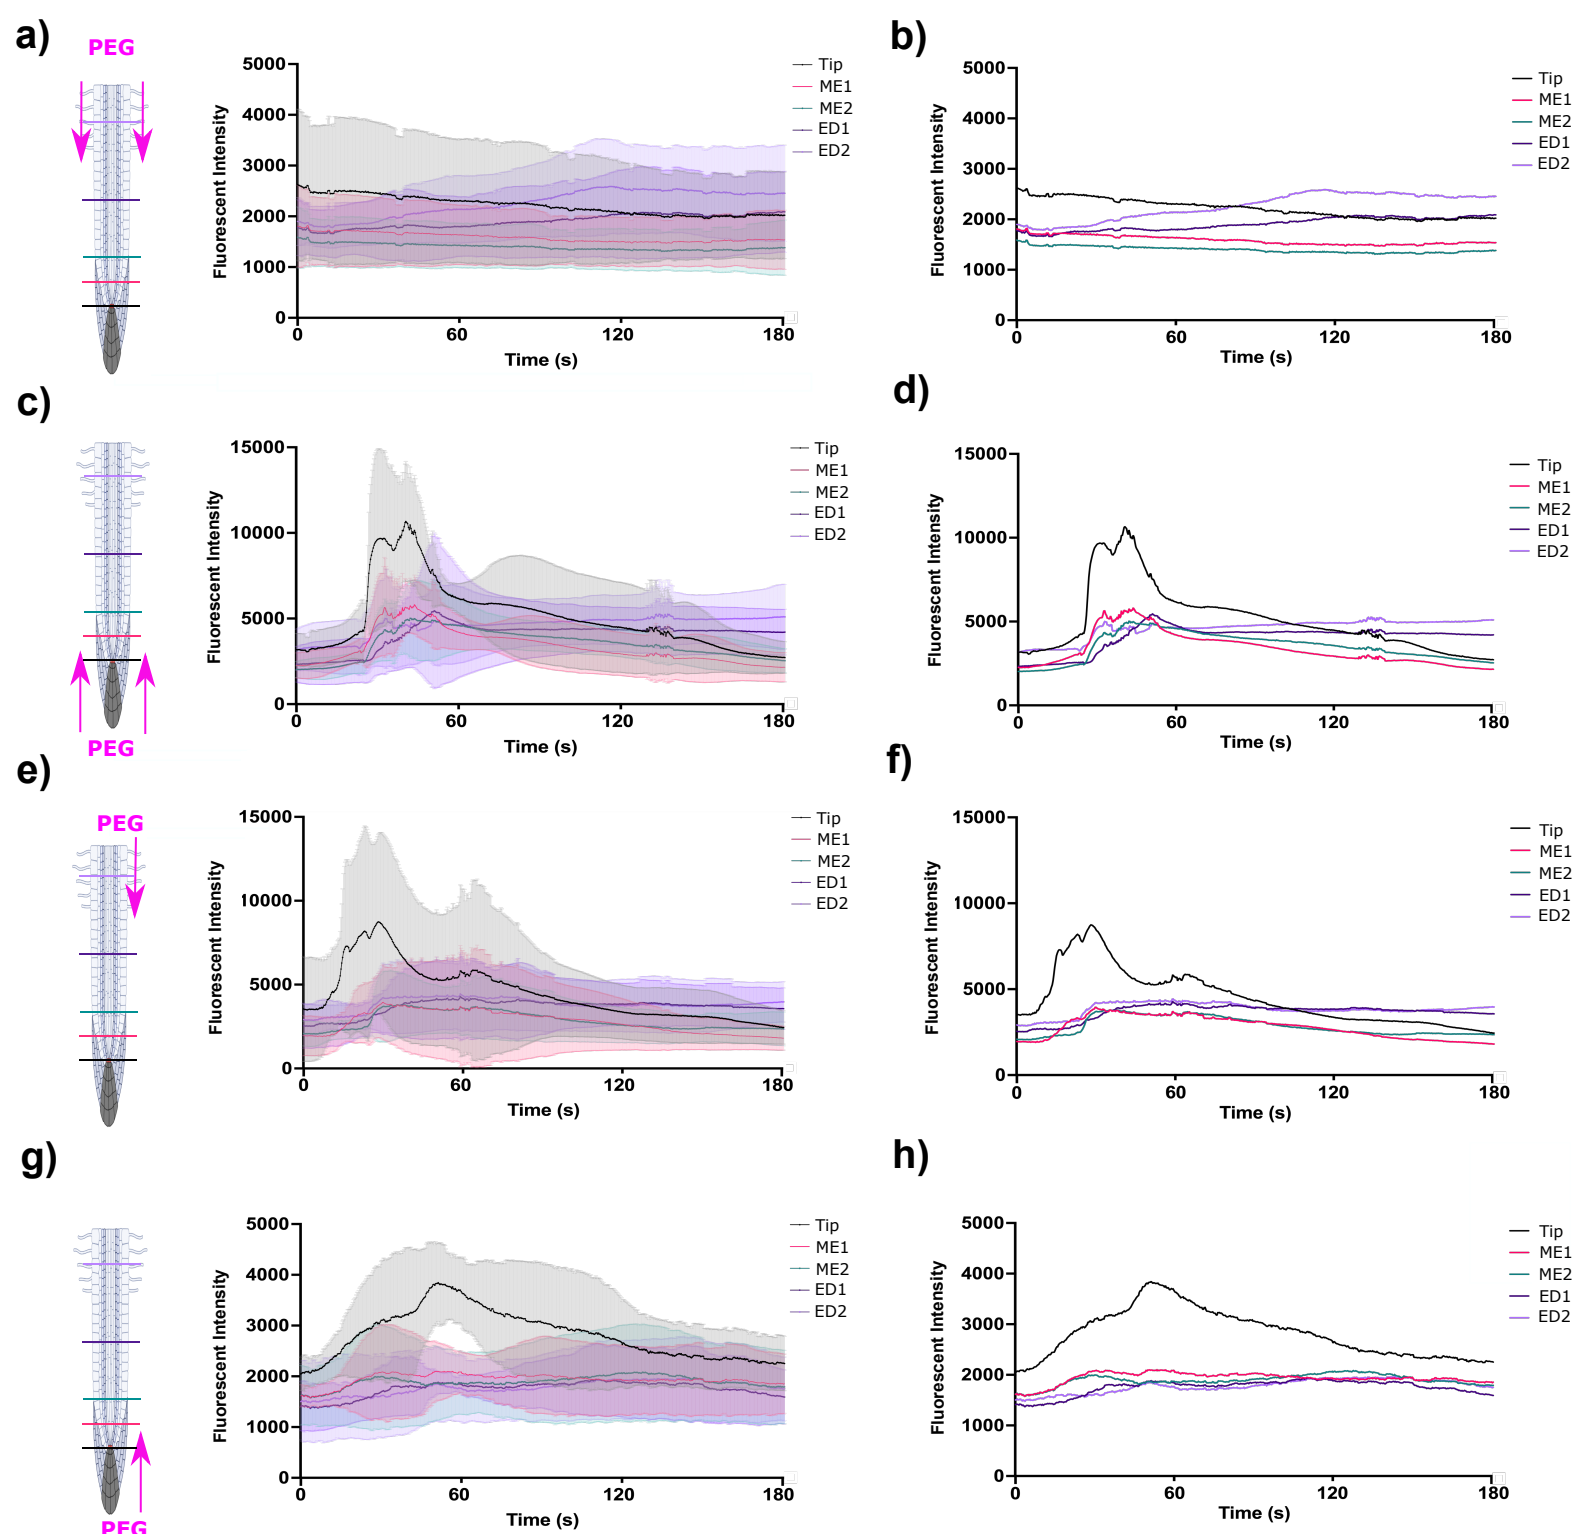

Supplemental Figure 4.  $\text{Ca}^{2+}$  release and corresponding increase in G-CaMP3 fluorescence, in Arabidopsis primary roots was followed for 180 s post PEG (20%) treatment. Root schematics depict treatment application, orientation (Polyethylene glycol; PEG) and linear sections (refer to colour key). (a) Line graph depicting average fluorescence intensity (ADU; analogue digital units) of  $\text{Ca}^{2+}$  across five linear sections (Tip, ME1, ME2, ED1 & ED2) upon targeted exposure of PEG treatment through inlets A & B at the DZ ( $n = 5$ ). Standard deviation included. (b) Line graph depicting mean fluorescence intensity (ADU; analogue digital units) of  $\text{Ca}^{2+}$  across five linear sections upon targeted exposure of PEG treatment through inlets A & B at the DZ ( $n = 5$ ). (d) Line graph depicting average fluorescence intensity of  $\text{Ca}^{2+}$  across five linear sections following PEG treatment through inlets C & D at the tip ( $n = 5$ ). Standard deviation included. (e) Line graph depicting mean fluorescence intensity of  $\text{Ca}^{2+}$  across five linear sections following PEG treatment through inlets C & D at the tip ( $n = 5$ ). (e) Line graph depicting average fluorescence intensity of  $\text{Ca}^{2+}$  across 5 linear sections following PEG treatment through inlet B and control treatment through inlet A at the DZ ( $n = 5$ ). Standard deviation included. (f) Line graph depicting mean fluorescence intensity of  $\text{Ca}^{2+}$  across five linear sections following PEG treatment through inlet B and control treatment through inlet A at the DZ ( $n = 5$ ). (g) Line graph depicting average fluorescence intensity of  $\text{Ca}^{2+}$  across five linear sections upon PEG treatment through inlet D and control through inlet C at the tip ( $n = 5$ ). Standard deviation included. (h) Line graph depicting mean fluorescence intensity of  $\text{Ca}^{2+}$  across five linear sections upon PEG treatment through inlet D and control through inlet C at the tip ( $n = 5$ ).
