# Supplementary material for: A dual-flow RootChip enables quantification of bi-directional calcium signaling in primary roots
Source: PubMed Central journal article supplement (PMC9871814; doi:10.3389/fpls.2022.1040117), 2023-01-10
Supplement: DataSheet_5.pdf [file DataSheet_5.pdf]

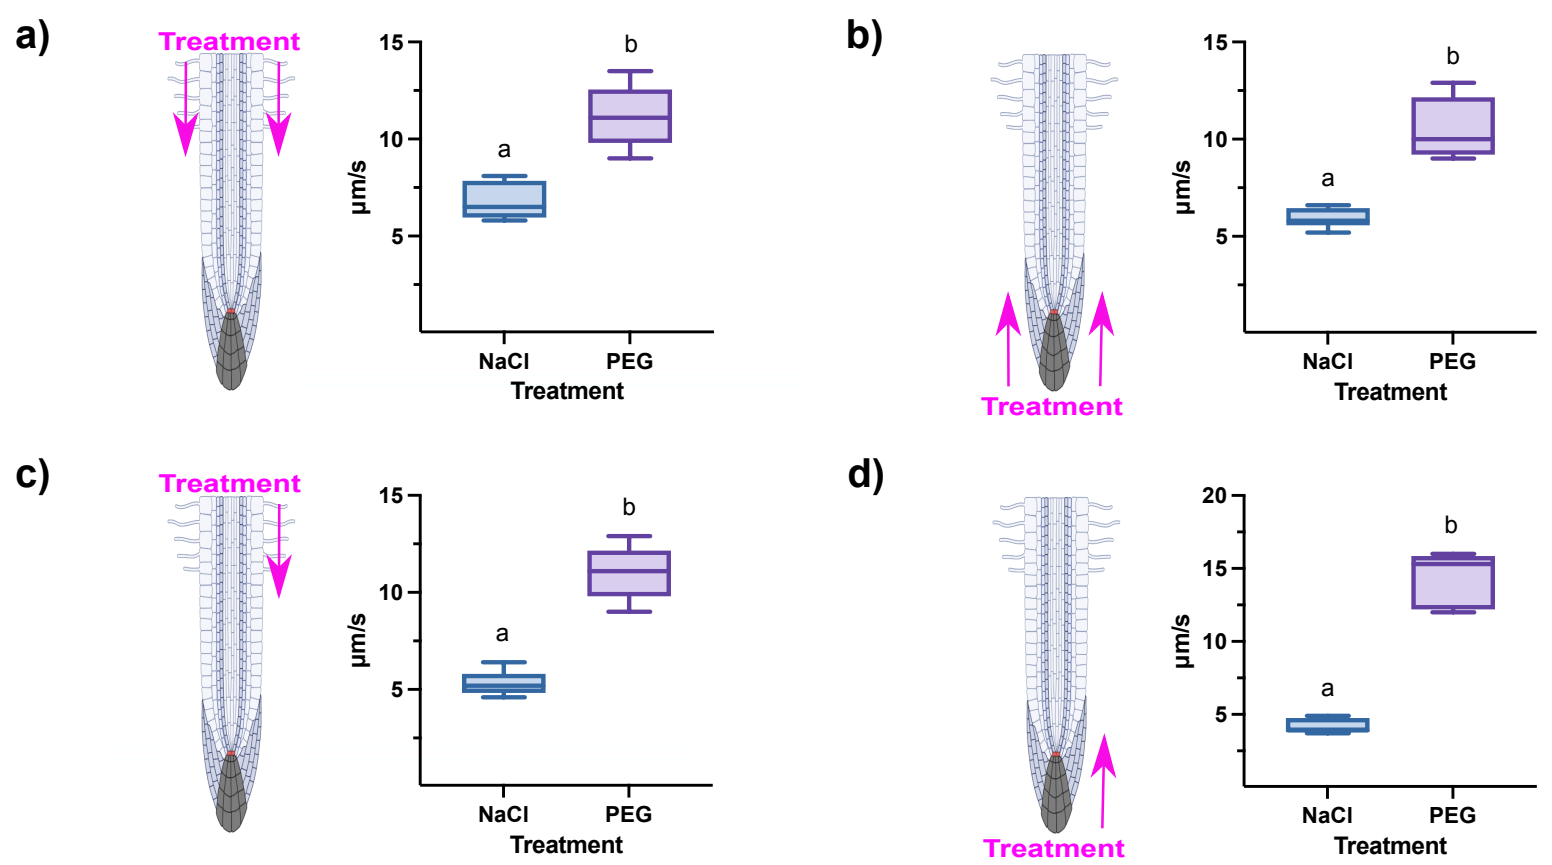

Supplemental Figure 5. Comparison of the  $\text{Ca}^{2+}$  signal transmission speed between full, one-sided NaCl and PEG treated samples at the differentiation zone and tip. Schematic diagrams of a root depicting treatment orientations and localisations. Box graphs with unpaired  $t$  test Welch's correction two-tailed test ( $P$ -value  $\leq 0.01$ ). (a) Longitudinal  $\text{Ca}^{2+}$  signal speed ( $\mu\text{m/s}$ ) following full NaCl and PEG treatment at the differentiation zone, (b) full NaCl and PEG treatment at the tip, (c) one-sided NaCl and PEG treatment at the differentiation zone, (d) and one-sided NaCl and PEG treatment at the tip.
